# Supplementary material
Source: Royal Society of Chemistry journal article supplement (doi:10.1039/d5cp05050b)
Supplement: d5cp05050b2.xlsx [file d5cp05050b2.xlsx]

## Sheet: Cl-4AEC4P
Wavenumber	Signal
2937.27	322.326
2938.47	-78.9094
2939.67	470.707
2940.88	459.125
2942.08	702.122
2943.28	498.806
2944.48	569.492
2945.68	206.076
2946.89	347.011
2948.09	109.4
2949.29	332.943
2950.49	283.075
2951.69	202.549
2952.9	242.612
2954.1	-26.9621
2955.3	121.225
2956.5	329.821
2957.71	233.651
2958.91	181.433
2960.11	165.411
2961.31	150.177
2962.51	9.87092
2963.72	50.2608
2964.92	73.5735
2966.12	76.1902
2967.32	232.398
2968.53	343.945
2969.73	492.379
2970.93	-17.62
2972.13	250.797
2973.33	21.1038
2974.54	452.991
2975.74	617.631
2976.94	604.963
2978.14	731.812
2979.35	1005.5
2980.55	1328.11
2981.75	2205.65
2982.95	2109.92
2984.15	1675.3
2985.36	1142.31
2986.56	994.777
2987.76	370.32
2988.96	612.087
2990.17	964.739
2991.37	823.81
2992.57	703.706
2993.77	409.737
2994.97	963.178
2996.18	809.176
2997.38	899.375
2998.58	607.468
2999.78	830.335
3000.99	813.542
3002.19	888.307
3003.39	874.394
3004.59	967.855
3005.79	933.266
3007	738.846
3008.2	1171.23
3009.4	1195.25
3010.6	923.974
3011.81	688.246
3013.01	575.73
3014.21	858.465
3015.41	652.973
3016.61	728.264
3017.82	654.362
3019.02	547.59
3020.22	454.973
3021.42	517.381
3022.63	363.683
3023.83	573.112
3025.03	288.27
3026.23	193.025
3027.43	349.199
3028.64	356.704
3029.84	418.393
3031.04	393.03
3032.24	277.989
3033.45	280.725
3034.65	97.2463
3035.85	429.008
3037.05	196.764
3038.25	449.98
3039.46	644.813
3040.66	204.37
3041.86	707.322
3043.06	698.238
3044.27	510.353
3045.47	218.991
3046.67	452.416
3047.87	471.503
3049.07	621.925
3050.28	139.267
3051.48	459.773
3052.68	243.658
3053.88	191.511
3055.09	318.964
3056.29	297.98
3057.49	159.764
3058.69	245.495
3059.89	343.046
3061.1	509.343
3062.3	56.636
3063.5	423.089
3064.7	345.165
3065.91	297.602
3067.11	76.3266
3068.31	307.507
3069.51	373.112
3070.71	387.09
3071.92	20.7602
3073.12	37.7914
3074.32	392.692
3075.52	206.589
3076.73	213.938
3077.93	217.571
3079.13	347.223
3080.33	410.192
3081.53	4.16989
3082.74	109.938
3083.94	-136.144
3085.14	201.54
3086.34	607.352
3087.55	487.294
3088.75	155.71
3089.95	472.524
3091.15	704.695
3092.35	545.593
3093.56	396.894
3094.76	500.273
3095.96	769.734
3097.16	1329.13
3098.37	1071.11
3099.57	1384.2
3100.77	1189.24
3101.97	1679.67
3103.17	1876.93
3104.38	2475.42
3105.58	2982.42
3106.78	4044.33
3107.98	4553.95
3109.19	5561.17
3110.39	5859.15
3111.59	5393.77
3112.79	4589.23
3113.99	4347.64
3115.2	3458.67
3116.4	2841.36
3117.6	2838.57
3118.8	2597.74
3120.01	2179.72
3121.21	2066.32
3122.41	1596.61
3123.61	1438.19
3124.81	982.132
3126.02	1420.51
3127.22	1458.23
3128.42	1835.14
3129.62	2006.66
3130.82	2448.12
3132.03	2542.64
3133.23	1902.04
3134.43	1798.93
3135.63	1549.33
3136.84	1249.01
3138.04	1196.07
3139.24	1169.89
3140.44	748.129
3141.64	675.197
3142.85	608.314
3144.05	597.471
3145.25	392.103
3146.45	737.703
3147.66	903.256
3148.86	950.192
3150.06	1066.32
3151.26	742.281
3152.46	844.53
3153.67	872.733
3154.87	1284.68
3156.07	1248.93
3157.27	1194.48
3158.48	1129.29
3159.68	917.379
3160.88	952.066
3162.08	1213.93
3163.28	1272.28
3164.49	1440.64
3165.69	1382.37
3166.89	1311.8
3168.09	1352.44
3169.3	1684.59
3170.5	1789.88
3171.7	1418.94
3172.9	1722.29
3174.1	1436.83
3175.31	1045.29
3176.51	1435.96
3177.71	1012.99
3178.91	750.238
3180.12	798.587
3181.32	999.239
3182.52	1307.44
3183.72	1167.18
3184.92	1121.11
3186.13	1059.25
3187.33	1650.18
3188.53	1395.46
3189.73	1583.62
3190.94	1718.69
3192.14	1882.73
3193.34	1806.81
3194.54	2071.11
3195.74	1591.89
3196.95	1586.44
3198.15	1474.25
3199.35	1275.82
3200.55	877.154
3201.76	817.723
3202.96	999.473
3204.16	919.337
3205.36	1015.7
3206.56	1012.73
3207.77	1500.09
3208.97	1560.5
3210.17	1963.75
3211.37	1599.42
3212.58	1628.89
3213.78	1305.97
3214.98	1390.76
3216.18	1149.52
3217.38	538.49
3218.59	896.81
3219.79	742.979
3220.99	622.119
3222.19	509.982
3223.4	345.632
3224.6	496.913
3225.8	218.782
3227	331.854
3228.2	688.448
3229.41	511.962
3230.61	500.196
3231.81	479.922
3233.01	446.117
3234.22	496.482
3235.42	823.055
3236.62	481.781
3237.82	453.316
3239.02	368.542
3240.23	510.803
3241.43	344.006
3242.63	389.818
3243.83	420.112
3245.04	321.631
3246.24	246.424
3247.44	43.3413
3248.64	169.589
3249.84	181.004
3251.05	276.503
3252.25	111.916
3253.45	129.062
3254.65	161.343
3255.86	167.694
3257.06	260.828
3258.26	453.665
3259.46	362.451
3260.66	374.661
3261.87	183.954
3263.07	264.698
3264.27	141.467
3265.47	130.313
3266.68	281.794
3267.88	234.701
3269.08	138.1
3270.28	284.153
3271.48	-1.25863
3272.69	48.6234
3273.89	145.009
3275.09	29.7335
3276.29	-71.7508
3277.5	90.6192
3278.7	97.2323
3279.9	70.3336
3281.1	-27.0513
3282.3	145.712
3283.51	120.423
3284.71	38.8561
3285.91	146.75
3287.11	110.837
3288.32	-6.99563
3289.52	179.485
3290.72	192.66
3291.92	270.761
3293.12	-38.4311
3294.33	230.849
3295.53	66.5336
3296.73	67.451
3297.93	477.061

## Sheet: Br-4AEC4P
Wavenumber	Signal
2937.28	2.31847
2938.48	3.63537
2939.69	5.73166
2940.89	6.80632
2942.1	4.36218
2943.3	2.06535
2944.5	4.45964
2945.71	4.25537
2946.91	3.76241
2948.11	4.06831
2949.32	3.44919
2950.52	3.26073
2951.72	4.75492
2952.93	3.81322
2954.13	3.46757
2955.34	2.21756
2956.54	-1.41461
2957.74	-1.66808
2958.95	2.08404
2960.15	2.92698
2961.35	1.2154
2962.56	3.14706
2963.76	5.11082
2964.97	0.219896
2966.17	0.178179
2967.37	-3.25482
2968.58	1.80709
2969.78	1.8321
2970.98	0.404734
2972.19	1.8098
2973.39	4.86189
2974.59	3.45299
2975.8	2.24231
2977	3.92801
2978.21	6.99653
2979.41	10.1863
2980.61	17.9285
2981.82	28.1235
2983.02	31.4282
2984.22	26.0636
2985.43	15.3573
2986.63	12.5391
2987.83	7.32624
2989.04	4.00358
2990.24	7.4983
2991.45	6.0311
2992.65	6.69462
2993.85	4.972
2995.06	7.77214
2996.26	5.24823
2997.46	9.06003
2998.67	8.57148
2999.87	8.58866
3001.07	10.3243
3002.28	5.53658
3003.48	6.26039
3004.69	8.16576
3005.89	7.95945
3007.09	10.2314
3008.3	12.456
3009.5	8.64386
3010.7	8.04393
3011.91	3.09401
3013.11	8.0131
3014.31	6.74714
3015.52	6.29436
3016.72	8.11657
3017.93	6.15524
3019.13	5.07515
3020.33	4.59089
3021.54	0.622546
3022.74	3.58509
3023.94	0.723054
3025.15	4.55428
3026.35	1.52623
3027.55	0.525281
3028.76	4.34375
3029.96	3.22783
3031.17	5.64772
3032.37	2.68186
3033.57	5.59357
3034.78	2.54859
3035.98	6.08048
3037.18	5.4452
3038.39	0.589595
3039.59	0.432921
3040.79	0.547158
3042	0.408674
3043.2	4.70454
3044.41	1.10686
3045.61	2.60191
3046.81	1.00303
3048.02	4.04914
3049.22	3.21329
3050.42	2.25825
3051.63	0.816464
3052.83	3.84921
3054.04	4.00897
3055.24	2.29469
3056.44	2.02024
3057.65	3.26424
3058.85	2.26293
3060.05	5.32054
3061.26	6.86998
3062.46	8.3377
3063.66	3.74579
3064.87	6.25921
3066.07	4.92409
3067.28	0.628906
3068.48	1.62841
3069.68	3.48819
3070.89	1.56587
3072.09	-0.360849
3073.29	0.635656
3074.5	3.24289
3075.7	1.96514
3076.9	2.96697
3078.11	3.91207
3079.31	2.6612
3080.52	3.95367
3081.72	5.75424
3082.92	3.43652
3084.13	1.08779
3085.33	4.61703
3086.53	5.46189
3087.74	3.79303
3088.94	5.00289
3090.14	1.65443
3091.35	3.64965
3092.55	5.78453
3093.76	2.75678
3094.96	6.35414
3096.16	3.20844
3097.37	3.97175
3098.57	4.40702
3099.77	2.90422
3100.98	6.96087
3102.18	6.12467
3103.38	5.13954
3104.59	5.05705
3105.79	7.53682
3107	7.3376
3108.2	9.92549
3109.4	14.8314
3110.61	17.1464
3111.81	20.2835
3113.01	26.8756
3114.22	41.2114
3115.42	52.4655
3116.62	65.3469
3117.83	76.273
3119.03	77.031
3120.24	66.2962
3121.44	49.5405
3122.64	35.08
3123.85	23.2661
3125.05	19.0507
3126.25	11.2849
3127.46	10.6562
3128.66	13.0155
3129.86	13.7927
3131.07	20.7215
3132.27	20.1225
3133.48	30.5027
3134.68	36.4517
3135.88	51.5009
3137.09	61.691
3138.29	67.9986
3139.49	80.714
3140.7	76.4003
3141.9	65.7084
3143.11	53.6888
3144.31	44.8374
3145.51	34.3495
3146.72	32.1444
3147.92	25.9406
3149.12	20.8981
3150.33	21.5567
3151.53	16.9541
3152.73	15.9006
3153.94	21.1534
3155.14	21.391
3156.35	19.3431
3157.55	16.0901
3158.75	16.8852
3159.96	18.8667
3161.16	20.6367
3162.36	22.1741
3163.57	24.3343
3164.77	26.4999
3165.97	26.0487
3167.18	26.5559
3168.38	28.8036
3169.59	26.8809
3170.79	26.5891
3171.99	24.1655
3173.2	22.2434
3174.4	17.3989
3175.6	21.3275
3176.81	16.6492
3178.01	16.747
3179.21	16.553
3180.42	19.1728
3181.62	20.0259
3182.83	25.4788
3184.03	36.1446
3185.23	38.2037
3186.44	38.7275
3187.64	41.0851
3188.84	40.0803
3190.05	38.2054
3191.25	29.3349
3192.45	25.4219
3193.66	22.4101
3194.86	15.7117
3196.07	18.9974
3197.27	21.0208
3198.47	23.5991
3199.68	27.4514
3200.88	25.2369
3202.08	27.2147
3203.29	32.4983
3204.49	33.9555
3205.69	41.0721
3206.9	44.4664
3208.1	40.4633
3209.31	40.0885
3210.51	36.9485
3211.71	31.6404
3212.92	28.5263
3214.12	22.6817
3215.32	24.0857
3216.53	23.4077
3217.73	17.8009
3218.93	18.6426
3220.14	19.1599
3221.34	19.536
3222.55	18.622
3223.75	18.935
3224.95	19.3086
3226.16	18.1604
3227.36	16.7713
3228.56	18.0128
3229.77	13.289
3230.97	12.7177
3232.17	9.65127
3233.38	6.02249
3234.58	4.6371
3235.79	6.82176
3236.99	4.74444
3238.19	3.13516
3239.4	4.83073
3240.6	5.44387
3241.8	6.45479
3243.01	5.1032
3244.21	3.42288
3245.42	3.43944
3246.62	1.12461
3247.82	0.270485
3249.03	3.95662
3250.23	7.77529
3251.43	2.05174
3252.64	4.76561
3253.84	4.2231
3255.04	1.84206
3256.25	2.90581
3257.45	2.6144
3258.66	1.56791
3259.86	2.94647
3261.06	3.21878
3262.27	5.79108
3263.47	2.82089
3264.67	2.3895
3265.88	2.94133
3267.08	3.27713
3268.28	3.53933
3269.49	1.42229
3270.69	0.903081
3271.9	3.98418
3273.1	1.89057
3274.3	1.18353
3275.51	1.59332
3276.71	1.78876
3277.91	3.20772
3279.12	1.75563
3280.32	1.40365
3281.52	-1.3391
3282.73	0.889468
3283.93	2.00877
3285.14	2.22615
3286.34	3.0818
3287.54	2.89028
3288.75	0.717753
3289.95	0.221556
3291.15	0.853068
3292.36	0.672254
3293.56	0.986146
3294.76	0.866933
3295.97	-0.68681
3297.17	-1.42359

## Sheet: I-4AEC4P
Wavenumber	Signal
2937.2	4.95646
2938.4	3.44116
2939.6	3.21942
2940.79	6.08839
2941.99	2.96728
2943.19	4.47553
2944.39	2.84555
2945.59	4.06556
2946.79	3.60686
2947.99	1.71666
2949.19	0.719172
2950.39	4.28205
2951.59	4.89332
2952.78	7.71456
2953.98	4.06712
2955.18	1.98035
2956.38	1.74671
2957.58	2.55632
2958.78	-0.0445322
2959.98	2.81892
2961.18	4.44727
2962.38	0.457517
2963.57	2.218
2964.77	-0.126761
2965.97	0.0651433
2967.17	-0.423341
2968.37	0.67271
2969.57	-1.67734
2970.77	1.84189
2971.97	4.19004
2973.17	1.25828
2974.37	3.57659
2975.56	4.62942
2976.76	2.37197
2977.96	2.97983
2979.16	6.34248
2980.36	10.3581
2981.56	11.5195
2982.76	25.6251
2983.96	31.646
2985.16	28.0155
2986.36	16.72
2987.55	10.5596
2988.75	7.06272
2989.95	8.3203
2991.15	6.67591
2992.35	5.27125
2993.55	6.25975
2994.75	3.06335
2995.95	7.23676
2997.15	7.6375
2998.35	2.79154
2999.54	5.84005
3000.74	2.83818
3001.94	5.4138
3003.14	0.677694
3004.34	1.49696
3005.54	2.55728
3006.74	2.38187
3007.94	4.82816
3009.14	2.62031
3010.33	3.90311
3011.53	5.20363
3012.73	3.81107
3013.93	1.64224
3015.13	2.68803
3016.33	1.33049
3017.53	2.40466
3018.73	1.83045
3019.93	1.29891
3021.13	0.0810296
3022.32	1.83771
3023.52	0.941894
3024.72	1.97033
3025.92	-0.983499
3027.12	-1.99814
3028.32	-0.0627788
3029.52	3.14653
3030.72	1.70049
3031.92	2.19676
3033.12	0.348397
3034.31	3.4709
3035.51	0.512224
3036.71	-1.7524
3037.91	3.26574
3039.11	5.42225
3040.31	1.24483
3041.51	0.177968
3042.71	-1.11084
3043.91	-0.774314
3045.11	1.72082
3046.3	-0.824392
3047.5	1.54682
3048.7	2.20894
3049.9	2.24622
3051.1	4.95337
3052.3	5.36833
3053.5	2.74067
3054.7	4.59628
3055.9	1.65847
3057.09	1.62507
3058.29	3.79275
3059.49	0.940957
3060.69	3.68272
3061.89	3.5332
3063.09	0.795612
3064.29	1.37765
3065.49	1.10154
3066.69	0.134549
3067.89	1.17095
3069.08	0.375344
3070.28	0.297345
3071.48	1.47622
3072.68	-0.365896
3073.88	-0.551352
3075.08	2.19665
3076.28	0.747415
3077.48	2.80387
3078.68	2.09656
3079.88	2.8218
3081.07	0.521129
3082.27	0.564291
3083.47	0.924213
3084.67	1.64388
3085.87	0.257182
3087.07	0.239702
3088.27	0.817354
3089.47	0.848469
3090.67	1.64588
3091.87	1.66169
3093.06	-1.84811
3094.26	1.9881
3095.46	1.09851
3096.66	1.05694
3097.86	1.40476
3099.06	2.27552
3100.26	1.19525
3101.46	0.252644
3102.66	1.96963
3103.86	1.61679
3105.05	1.57033
3106.25	2.17341
3107.45	2.70445
3108.65	-0.485759
3109.85	4.38602
3111.05	4.13158
3112.25	6.14364
3113.45	7.83609
3114.65	7.66388
3115.84	10.5942
3117.04	23.3126
3118.24	27.8695
3119.44	34.5397
3120.64	38.3895
3121.84	44.0177
3123.04	33.0818
3124.24	20.7351
3125.44	13.0463
3126.64	8.82473
3127.83	5.59697
3129.03	1.39741
3130.23	3.83882
3131.43	1.8414
3132.63	0.774852
3133.83	0.705838
3135.03	0.765597
3136.23	2.56022
3137.43	5.02433
3138.63	5.50995
3139.82	7.4579
3141.02	5.87494
3142.22	5.76704
3143.42	3.92148
3144.62	13.0095
3145.82	12.6957
3147.02	19.4411
3148.22	25.4078
3149.42	31.6343
3150.62	38.6759
3151.81	39.7608
3153.01	44.5464
3154.21	41.9674
3155.41	36.4053
3156.61	34.6967
3157.81	32.5152
3159.01	26.3371
3160.21	24.0138
3161.41	28.1083
3162.6	24.1254
3163.8	24.497
3165	27.2945
3166.2	27.9791
3167.4	35.05
3168.6	29.6866
3169.8	35.029
3171	28.8359
3172.2	27.1071
3173.4	21.549
3174.59	21.6641
3175.79	19.7936
3176.99	22.5637
3178.19	24.8026
3179.39	29.8595
3180.59	30.7739
3181.79	34.9666
3182.99	39.2317
3184.19	47.711
3185.39	65.515
3186.58	70.3022
3187.78	76.0024
3188.98	77.0248
3190.18	67.1639
3191.38	53.3846
3192.58	42.2315
3193.78	31.8952
3194.98	25.5347
3196.18	16.7326
3197.38	16.7227
3198.57	16.1007
3199.77	13.939
3200.97	14.282
3202.17	16.5566
3203.37	17.7971
3204.57	25.2397
3205.77	30.2915
3206.97	39.2264
3208.17	43.4074
3209.36	55.7133
3210.56	62.0982
3211.76	68.2384
3212.96	64.8261
3214.16	60.934
3215.36	56.007
3216.56	54.1804
3217.76	47.693
3218.96	48.4066
3220.16	51.9556
3221.35	48.6123
3222.55	46.4211
3223.75	42.7134
3224.95	38.0724
3226.15	31.0166
3227.35	26.3446
3228.55	21.4464
3229.75	18.3293
3230.95	14.9069
3232.15	15.5069
3233.34	13.6931
3234.54	14.1351
3235.74	9.94972
3236.94	10.3001
3238.14	10.6388
3239.34	8.46975
3240.54	6.77653
3241.74	7.44817
3242.94	8.27474
3244.14	6.82933
3245.33	6.86534
3246.53	4.25213
3247.73	4.59876
3248.93	4.83884
3250.13	4.76083
3251.33	3.85975
3252.53	7.02435
3253.73	4.87898
3254.93	5.57152
3256.12	5.62174
3257.32	3.56785
3258.52	3.57546
3259.72	2.50933
3260.92	3.94316
3262.12	4.26989
3263.32	2.56574
3264.52	2.22778
3265.72	3.71613
3266.92	5.05816
3268.11	2.43862
3269.31	0.605629
3270.51	1.01632
3271.71	0.191026
3272.91	1.09495
3274.11	2.30727
3275.31	1.61019
3276.51	3.21972
3277.71	1.13457
3278.91	0.995788
3280.1	0.987229
3281.3	1.97
3282.5	3.45224
3283.7	1.50927
3284.9	2.86374
3286.1	1.89156
3287.3	1.13508
3288.5	1.72315
3289.7	2.00611
3290.9	-0.185308
3292.09	1.78674
3293.29	-0.880065
3294.49	1.39156
3295.69	0.819969
3296.89	0.279829
3298.09	-1.50693
3299.29	0.0939415

## Sheet: I-omC4P
Wavenumber	Signal
2735.4	4.22898
2736.6	-0.0791502
2737.79	2.78817
2738.99	-3.36986
2740.18	-1.8997
2741.38	2.18622
2742.57	4.17906
2743.77	6.74549
2744.97	5.39806
2746.16	5.47223
2747.36	-1.4031
2748.55	-2.27565
2749.75	-0.789947
2750.95	3.98813
2752.14	4.85185
2753.34	5.65379
2754.53	7.6129
2755.73	-2.74496
2756.92	2.10198
2758.12	4.01974
2759.32	2.97286
2760.51	1.71427
2761.71	2.53686
2762.9	3.79145
2764.1	3.12309
2765.29	-1.29568
2766.49	-0.7029
2767.69	-0.509232
2768.88	4.63188
2770.08	1.21299
2771.27	3.74591
2772.47	1.79634
2773.66	-0.0365352
2774.86	3.41106
2776.06	0.53204
2777.25	-0.0147197
2778.45	4.68344
2779.64	2.13837
2780.84	3.1559
2782.04	0.498379
2783.23	4.17802
2784.43	6.40448
2785.62	0.50215
2786.82	0.794743
2788.01	0.812816
2789.21	0.0602277
2790.41	0.854472
2791.6	1.24012
2792.8	0.225379
2793.99	-0.589806
2795.19	1.26404
2796.38	-0.346622
2797.58	0.836781
2798.78	0.384821
2799.97	-0.00764939
2801.17	0.33058
2802.36	1.27874
2803.56	-0.17367
2804.75	0.748881
2805.95	-0.00593579
2807.15	0.805626
2808.34	0.827778
2809.54	1.92845
2810.73	1.29968
2811.93	1.74263
2813.13	0.676982
2814.32	1.07356
2815.52	1.07166
2816.71	1.76564
2817.91	1.36637
2819.1	0.886508
2820.3	0.519872
2821.5	0.254794
2822.69	0.543113
2823.89	0.118626
2825.08	1.11833
2826.28	0.409851
2827.47	0.307992
2828.67	0.719582
2829.87	0.945103
2831.06	0.792379
2832.26	1.0047
2833.45	1.02806
2834.65	1.29587
2835.85	2.51133
2837.04	1.95379
2838.24	1.51203
2839.43	2.82178
2840.63	3.24283
2841.82	1.01508
2843.02	1.11481
2844.22	1.80247
2845.41	0.211226
2846.61	1.7648
2847.8	1.92214
2849	2.82483
2850.19	0.901221
2851.39	1.71241
2852.59	1.8772
2853.78	1.39994
2854.98	2.1324
2856.17	1.49727
2857.37	1.36174
2858.56	1.40327
2859.76	1.79656
2860.96	2.93295
2862.15	3.42294
2863.35	5.63567
2864.54	4.45398
2865.74	9.06843
2866.94	7.18714
2868.13	7.55406
2869.33	7.57209
2870.52	8.70127
2871.72	11.0017
2872.91	9.07226
2874.11	10.5588
2875.31	8.70018
2876.5	7.55243
2877.7	9.95404
2878.89	9.14226
2880.09	9.70675
2881.28	10.2632
2882.48	7.89706
2883.68	6.39572
2884.87	6.54467
2886.07	4.43244
2887.26	5.08899
2888.46	6.70933
2889.65	4.99896
2890.85	8.74905
2892.05	7.81706
2893.24	6.24091
2894.44	4.90887
2895.63	8.25494
2896.83	6.1035
2898.03	5.36955
2899.22	7.01238
2900.42	4.43388
2901.61	4.75253
2902.81	5.94253
2904	7.84287
2905.2	5.56796
2906.4	4.73718
2907.59	6.12815
2908.79	5.19015
2909.98	6.49835
2911.18	7.11876
2912.37	6.95019
2913.57	10.1139
2914.77	12.0249
2915.96	16.1992
2917.16	16.2943
2918.35	16.337
2919.55	16.2605
2920.75	14.8515
2921.94	12.8956
2923.14	12.8481
2924.33	13.8309
2925.53	10.728
2926.72	12.655
2927.92	11.0078
2929.12	14.1692
2930.31	15.7856
2931.51	16.3885
2932.7	14.3415
2933.9	14.5425
2935.09	13.7894
2936.29	11.473
2937.49	9.94374
2938.68	9.13889
2939.88	10.3111
2941.07	10.7053
2942.27	9.90525
2943.46	10.9745
2944.66	11.266
2945.86	12.2472
2947.05	12.8483
2948.25	13.5564
2949.44	13.5874
2950.64	16.0861
2951.84	17.4809
2953.03	22.0339
2954.23	23.1917
2955.42	24.6693
2956.62	23.0783
2957.81	17.3452
2959.01	14.2909
2960.21	11.6143
2961.4	10.9361
2962.6	9.83076
2963.79	8.8674
2964.99	11.2472
2966.18	15.4302
2967.38	22.872
2968.58	33.0893
2969.77	44.638
2970.97	51.7706
2972.16	47.9099
2973.36	31.2572
2974.55	22.3368
2975.75	17.99
2976.95	20.4946
2978.14	20.5946
2979.34	22.7747
2980.53	21.037
2981.73	14.3412
2982.93	11.1706
2984.12	7.93223
2985.32	5.3893
2986.51	5.18484
2987.71	3.28845
2988.9	1.98267
2990.1	3.1758
2991.3	2.9082
2992.49	3.16458
2993.69	3.39147
2994.88	3.54061
2996.08	3.63516
2997.27	5.03383
2998.47	3.72674
2999.67	1.67209
3000.86	1.40041
3002.06	2.17958
3003.25	2.09676
3004.45	1.32785
3005.65	3.51053
3006.84	4.17763
3008.04	1.97909
3009.23	3.63278
3010.43	0.466183
3011.62	1.23522
3012.82	1.681
3014.02	1.60538
3015.21	0.345343
3016.41	0.242151
3017.6	0.0608226
3018.8	1.57608
3019.99	-0.118656
3021.19	0.333174
3022.39	0.901564
3023.58	0.0327696
3024.78	0.968782
3025.97	0.855723
3027.17	0.968202
3028.36	-0.346839
3029.56	1.11449
3030.76	0.861796
3031.95	2.13924
3033.15	0.529647
3034.34	1.5348
3035.54	1.74316
3036.74	-0.456882
3037.93	-0.46136
3039.13	0.666038
3040.32	0.797466
3041.52	1.81962
3042.71	0.995304
3043.91	1.22686
3045.11	1.008
3046.3	1.09957
3047.5	1.19425
3048.69	1.09368
3049.89	-0.00828687
3051.08	-0.862586
3052.28	0.183407
3053.48	-0.699705
3054.67	0.557037
3055.87	-0.226563
3057.06	0.733269
3058.26	0.596148
3059.45	0.137279
3060.65	0.299603
3061.85	0.498751
3063.04	0.979659
3064.24	0.148086
3065.43	0.435895
3066.63	1.02332
3067.83	1.41937
3069.02	0.737296
3070.22	0.302521
3071.41	-0.0821099
3072.61	0.823409
3073.8	-0.387987
3075	-0.738393
3076.2	-0.637883
3077.39	0.857246
3078.59	0.886078
3079.78	0.199402
3080.98	0.152132
3082.17	-0.0503217
3083.37	-0.168901
3084.57	1.91354
3085.76	1.9513
3086.96	0.509007
3088.15	0.918296
3089.35	0.339147
3090.55	1.87402
3091.74	0.505307
3092.94	0.928135
3094.13	-0.134476
3095.33	-1.53974
3096.52	-0.467627
3097.72	0.0534063
3098.92	1.90888
3100.11	-0.0954879
3101.31	0.841053
3102.5	0.104318
3103.7	-0.0825608
3104.89	1.87838
3106.09	2.56082
3107.29	3.31167
3108.48	5.11701
3109.68	9.57007
3110.87	14.0887
3112.07	19.7116
3113.26	21.9807
3114.46	20.1138
3115.66	28.352
3116.85	40.5948
3118.05	36.8666
3119.24	23.8783
3120.44	9.89256
3121.64	4.46429
3122.83	1.71761
3124.03	2.94755
3125.22	2.66541
3126.42	1.61356
3127.61	0.737788
3128.81	0.409646
3130.01	0.0835538
3131.2	-0.305357
3132.4	-0.100171
3133.59	-0.196348
3134.79	0.149822
3135.98	1.14093
3137.18	-0.0266815
3138.38	-0.696239
3139.57	0.294972
3140.77	0.611857
3141.96	1.05028
3143.16	0.597156
3144.35	0.245378
3145.55	-1.0416
3146.75	0.339384
3147.94	0.542838
3149.14	-0.554005
3150.33	0.362432
3151.53	-0.462128
3152.73	0.999066
3153.92	1.46463
3155.12	0.053589
3156.31	0.00846005
3157.51	0.234566
3158.7	0.892768
3159.9	0.680922
3161.1	1.35319
3162.29	1.71623
3163.49	2.05807
3164.68	0.62274
3165.88	1.81407
3167.07	0.77532
3168.27	0.776072
3169.47	0.803543
3170.66	1.92638
3171.86	0.859702
3173.05	1.00288
3174.25	1.41737
3175.45	0.991839
3176.64	1.09377
3177.84	0.924752
3179.03	0.723384
3180.23	0.19512
3181.42	-0.835238
3182.62	0.525157
3183.82	-0.617048
3185.01	-1.55494
3186.21	1.10573
3187.4	1.05214
3188.6	0.378284
3189.79	0.815396
3190.99	1.47598
3192.19	0.305244
3193.38	0.881465
3194.58	2.0322
3195.77	-0.0914997
3196.97	-0.354797
3198.16	-0.146296
3199.36	0.736294
3200.56	-1.20415
3201.75	-0.837853
3202.95	1.42905
3204.14	0.618816
3205.34	-1.18186
3206.54	-0.456139
3207.73	0.899016
3208.93	0.594046
3210.12	0.970764
3211.32	0.907005
3212.51	1.61662
3213.71	1.68612
3214.91	1.24857
3216.1	1.82218
3217.3	2.57778
3218.49	1.05493
3219.69	0.586688
3220.88	0.278138
3222.08	0.765762
3223.28	1.00396
3224.47	0.668939
3225.67	0.105616
3226.86	1.13134
3228.06	0.749816
3229.25	-0.497123
3230.45	0.0765956
3231.65	0.290552
3232.84	0.129277
3234.04	-0.375545
3235.23	1.32751
3236.43	1.20679
3237.63	-0.575784
3238.82	1.56583
3240.02	0.821381
3241.21	1.0509
3242.41	1.66239
3243.6	2.40958
3244.8	2.17735
3246	0.979333
3247.19	1.4019
3248.39	1.85763
3249.58	0.702122
3250.78	1.80205
3251.97	0.63972
3253.17	1.36816
3254.37	0.738709
3255.56	1.51495
3256.76	0.123397
3257.95	1.31553
3259.15	0.2518
3260.35	1.3886
3261.54	2.58344
3262.74	1.97891
3263.93	3.10451
3265.13	2.37776
3266.32	0.259888
3267.52	3.15378
3268.72	2.38168
3269.91	1.53326
3271.11	2.00654
3272.3	1.82061
3273.5	2.02006
3274.69	2.38042
3275.89	4.19962
3277.09	4.20363
3278.28	5.10045
3279.48	7.15192
3280.67	9.22682
3281.87	14.417
3283.06	22.6565
3284.26	41.2968
3285.46	66.3919
3286.65	87.2394
3287.85	101.995
3289.04	88.1727
3290.24	81.5033
3291.44	61.5527
3292.63	42.8633
3293.83	26.107
3295.02	18.5839
3296.22	14.1663
3297.41	10.0531
3298.61	9.04836
3299.81	10.764
3301	11.4288
3302.2	12.4282
3303.39	17.6014
3304.59	20.0287
3305.78	25.5511
3306.98	40.0511
3308.18	67.5387
3309.37	88.9537
3310.57	98.0745
3311.76	84.1111
3312.96	88.8242
3314.15	63.9093
3315.35	41.1259
3316.55	31.7075
3317.74	21.5726
3318.94	12.6297
3320.13	9.07515
3321.33	5.98449
3322.53	4.64849
3323.72	2.46321
3324.92	1.541
3326.11	2.08187
3327.31	1.12798
3328.5	1.87927
3329.7	1.65353
3330.9	1.38288
3332.09	1.18146
3333.29	0.711952
3334.48	1.22755
3335.68	1.21072
3336.87	1.83105
3338.07	2.06338
3339.27	1.20905
3340.46	0.502213
3341.66	1.13263
3342.85	0.820352
3344.05	1.87086
3345.25	1.42989
3346.44	1.98776
3347.64	1.31934
3348.83	1.01375
3350.03	1.81764
3351.22	1.41029
3352.42	2.43625
3353.62	2.314
3354.81	4.30127
3356.01	5.79632
3357.2	7.79708
3358.4	7.85028
3359.59	7.46353
3360.79	6.3759
3361.99	4.82997
3363.18	2.46719
3364.38	2.72495
3365.57	1.26178
3366.77	1.19905
3367.96	0.2162
3369.16	1.1431
3370.36	0.515229
3371.55	0.7566
3372.75	-0.363761
3373.94	0.513303
3375.14	0.510974
3376.34	0.703238
3377.53	0.444349
3378.73	1.79822
3379.92	1.07493
3381.12	0.806444
3382.31	0.52887
3383.51	-0.236404
3384.71	-0.738545
3385.9	-0.182663
3387.1	0.83536
3388.29	-0.889166
3389.49	-0.743948
3390.68	0.00450992
3391.88	0.106101
3393.08	0.0427965
3394.27	-0.332483
3395.47	-0.710161
3396.66	0.170076
3397.86	0.630097
3399.05	1.60941
3400.25	0.0314353
3401.45	0.729859
3402.64	0.261695
3403.84	0.715316
3405.03	0.908055
3406.23	0.248029
3407.43	0.618457
3408.62	-0.343616
3409.82	0.216386
3411.01	-0.0129065
3412.21	-0.235947
3413.4	-0.51874
3414.6	-0.0277099
3415.8	-0.114191
3416.99	-0.0674464
3418.19	-0.723108
3419.38	-0.0233746
3420.58	0.0427543
3421.77	-0.72697
3422.97	0.157797
3424.17	0.891951
3425.36	0.459784
3426.56	-0.390266
3427.75	-0.0475762
3428.95	0.318729
3430.15	-0.10911
3431.34	-0.156428
3432.54	-0.289498
3433.73	-0.496405
3434.93	-0.66583
3436.12	0.399271
3437.32	-0.608932
3438.52	-0.0447539
3439.71	-0.0923096
3440.91	0.0908609
3442.1	0.46471
3443.3	0.180943
3444.49	0.786616
3445.69	0.474549
3446.89	3.34713
3448.08	0.858578
